# Supplementary material for: A novel Ru/TiO2hybrid nanocomposite catalyzed photoreduction of CO2to methanol under visible light
Source: Royal Society of Chemistry journal article supplement (doi:10.1039/c5nr03712c), 2015-01-01

## **Supporting Information**

### **A novel Ru/TiO<sub>2</sub> hybrid nanocomposite catalyzed photoreduction of CO<sub>2</sub> to methanol under visible light**

**Pawan Kumar<sup>a</sup>, Chetan Joshi<sup>a</sup>, Nitin Labhsetwar<sup>b</sup>, Rabah Boukherroub<sup>c</sup>, and Suman L. Jain<sup>a\*</sup>**

<sup>a</sup>Chemical Sciences Division, CSIR-Indian Institute of Petroleum, Dehradun India 248005

<sup>b</sup>Environmental Materials Division, CSIR-National Environmental Engineering Research Institute (CSIR-NEERI), Nagpur-India,

<sup>c</sup> Institut d'Electronique, de Microélectronique et de Nanotechnologie (IEMN)UMRCNRS 8520, Université Lille1, Avenue Poincaré-BP60069, 59652 Villeneuve d'Ascq Cédex, France

suman@iip.res.in

**Fig: S1** STEM Elemental Mapping and HR-TEM EDX Pattern of Ru(bpy)<sub>3</sub>/TiO<sub>2</sub> a) showing image of area scanned; b) Titanium; c) Oxygen; d) Ruthenium.

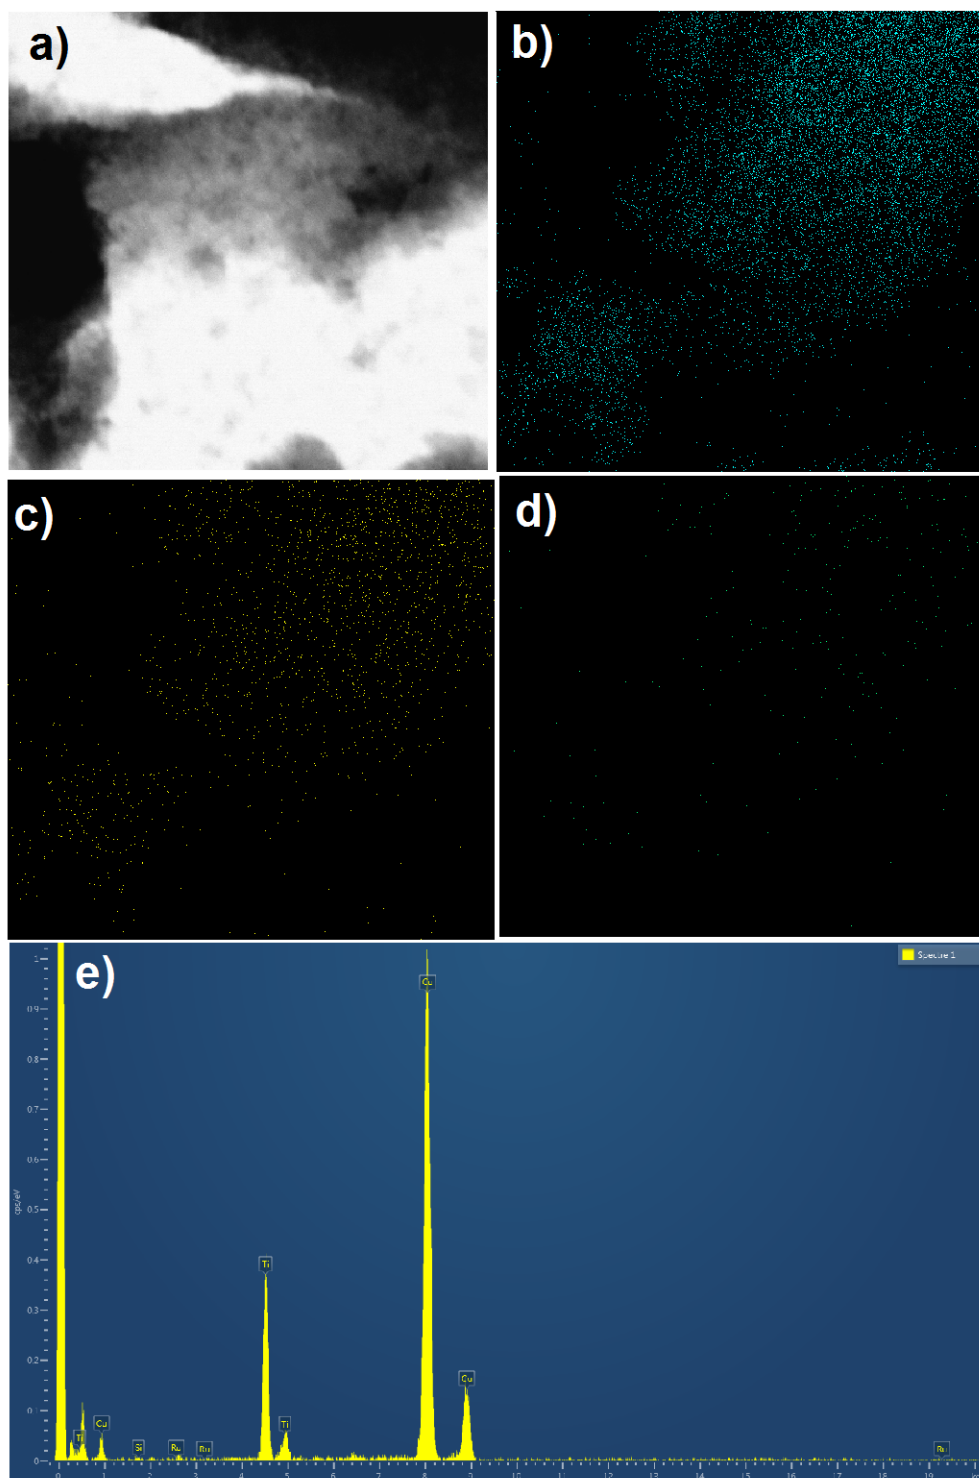

**Fig: S2** GC chromatogram of reaction product after 24 h of visible light irradiation using  $\text{Ru}(\text{bpy})_3/\text{TiO}_2$  as catalyst in DMF:  $\text{H}_2\text{O}$ :TEA (3:1:1)

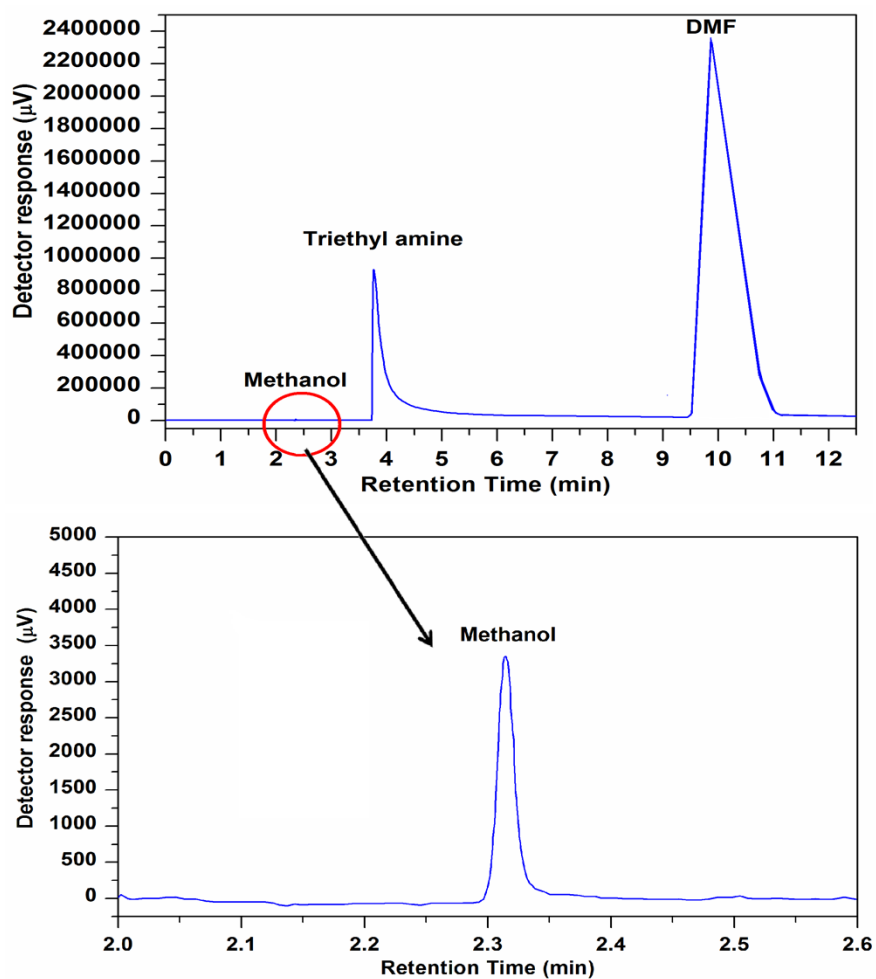

**Fig. S3:** GC chromatogram of reaction product after 24 h of visible light irradiation using  $\text{Ru}(\text{bpy})_3/\text{TiO}_2$  as catalyst in  $\text{CH}_3\text{CN}:\text{H}_2\text{O}:\text{TEA}$  (3:1:1)

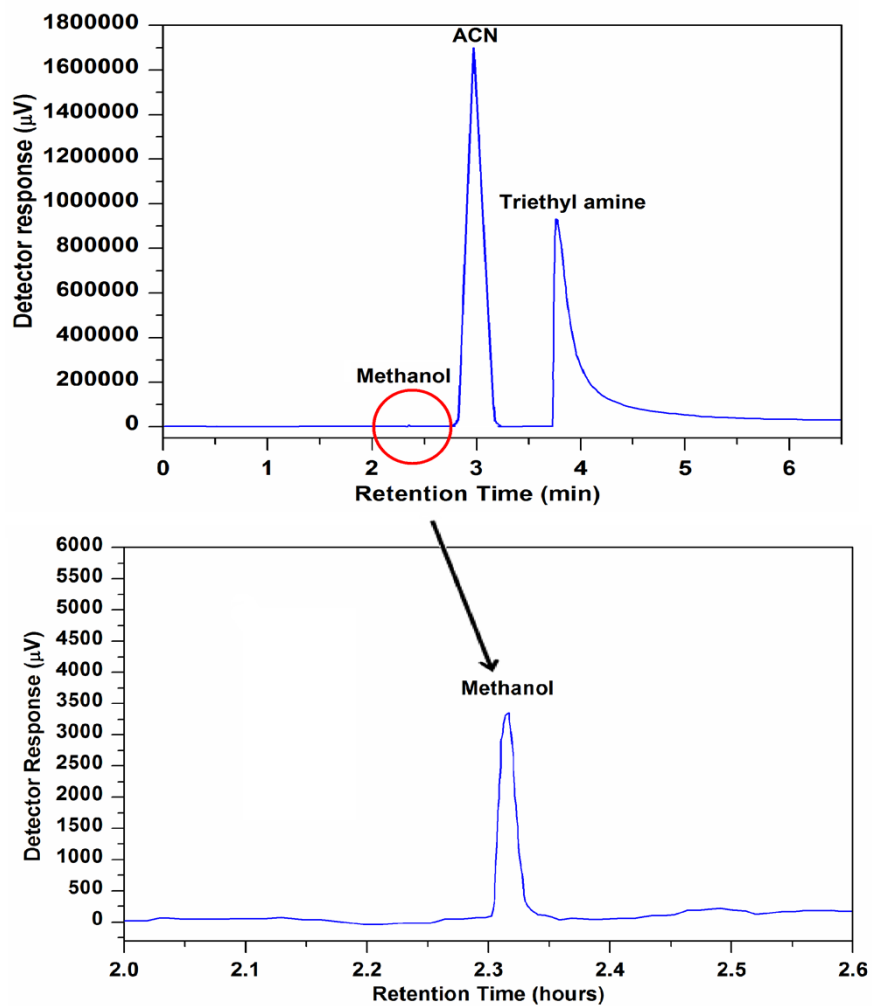

**Fig. S4:** Calibration curve for quantitative determination of methanol

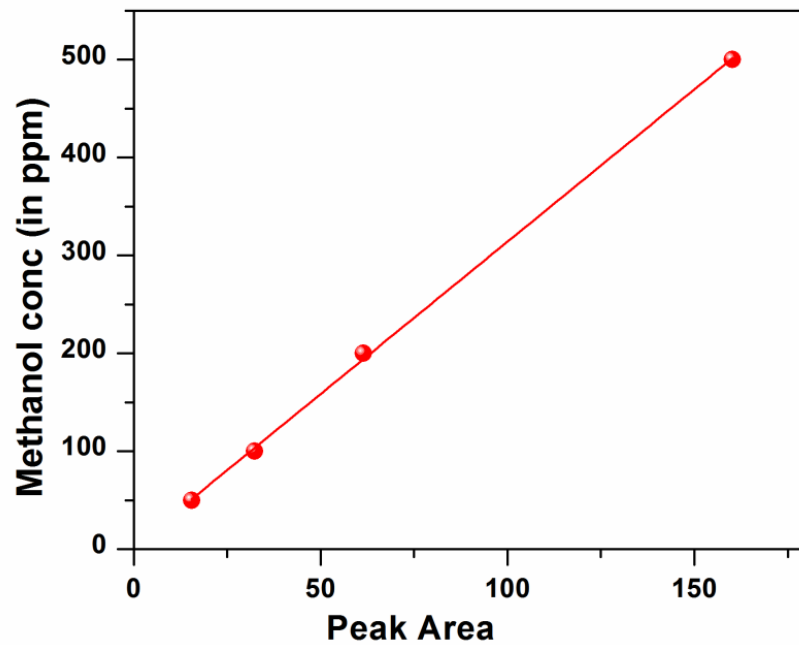

**Fig. S5:** Spectral power distribution of LED lamp

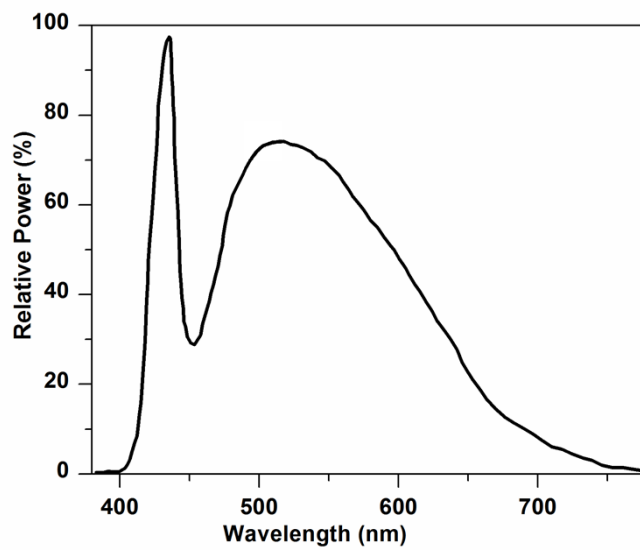

**Fig. S6:** GC Mass spectra of reaction product of CO<sub>2</sub> reduction after 24 h of visible light irradiation using Ru(bpy)<sub>3</sub>@TiO<sub>2</sub> as catalyst

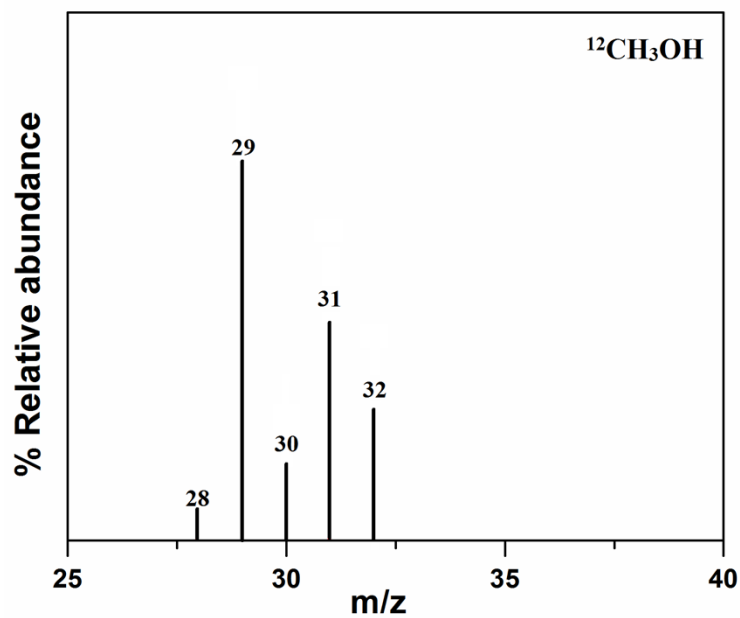

**Fig. S7:** GC Mass spectra of reaction product of <sup>13</sup>CO<sub>2</sub> reduction after 24 ho of visible light irradiation using Ru(bpy)<sub>3</sub>@TiO<sub>2</sub> as catalyst.

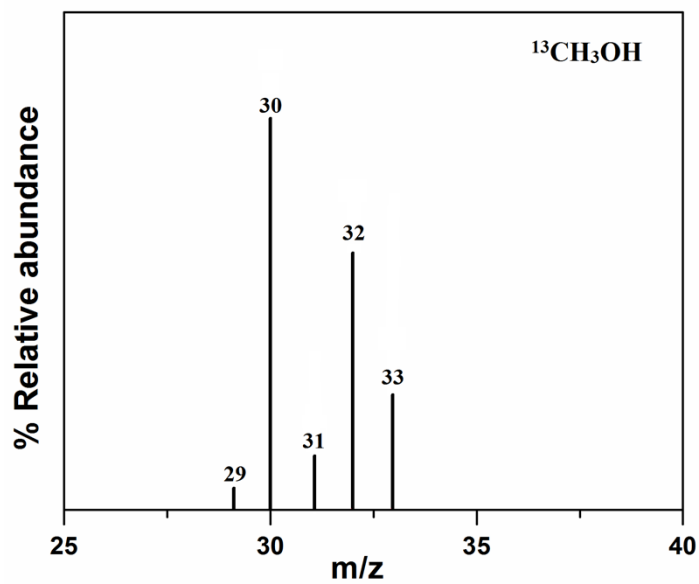

**Fig. S8** a) FE-SEM image b) FE-SEM EDX c) and d) elemental mapping by FE-SEM of recycled catalyst

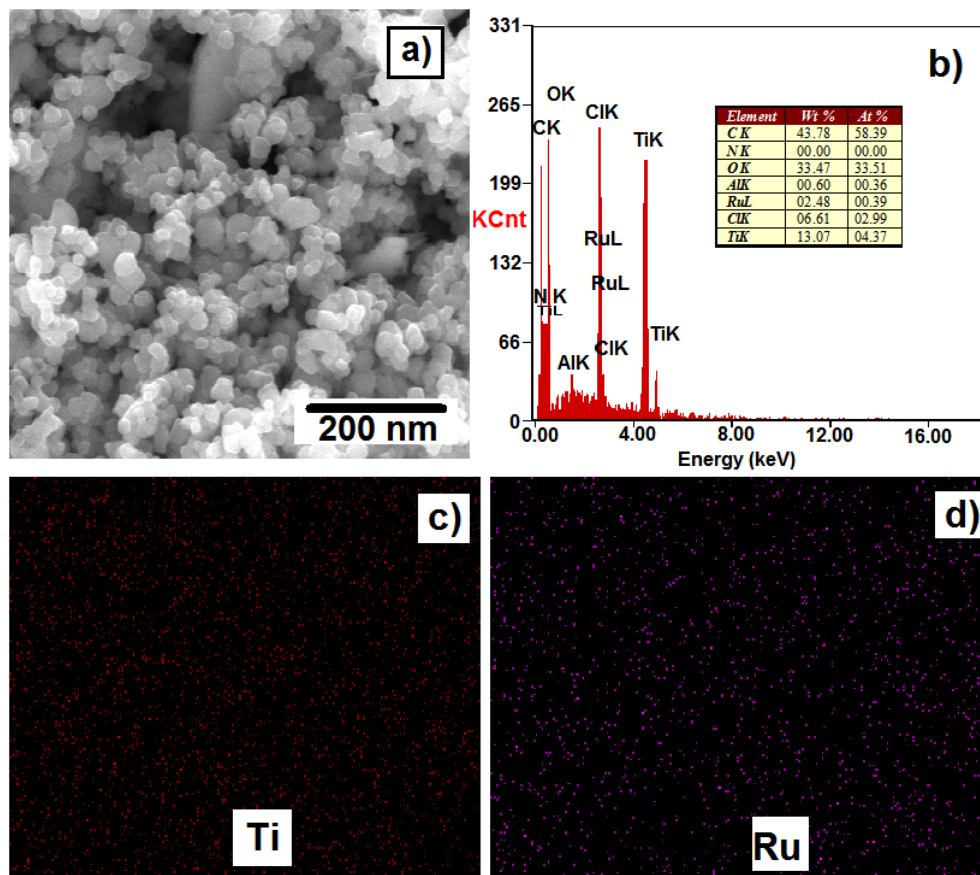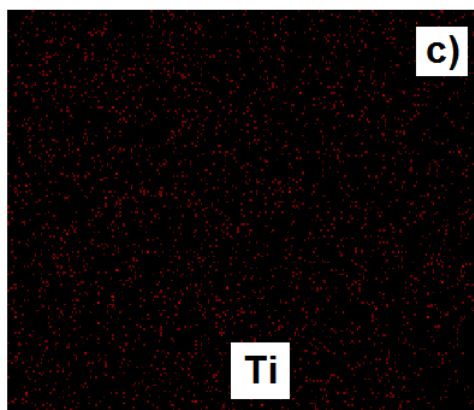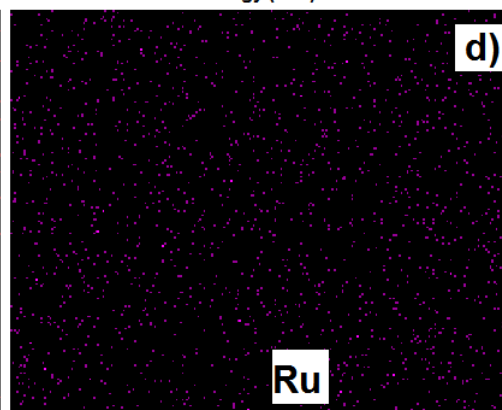

**Fig. S9** FTIR spectra of fresh and recycled catalyst.

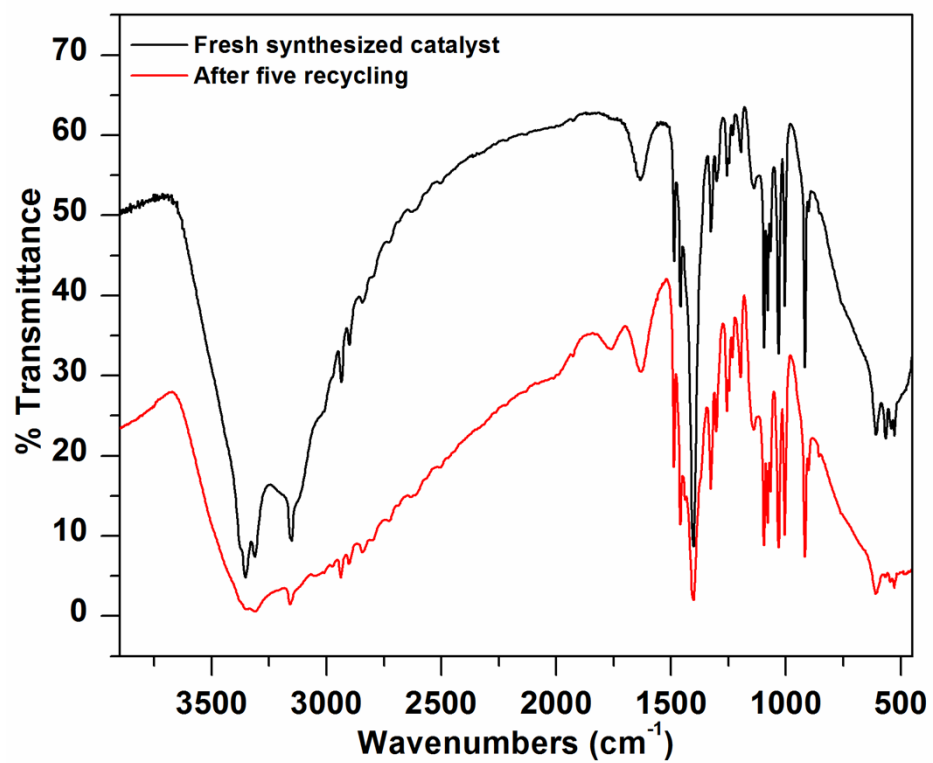



**Fig. S10** XRD diffraction Pattern of recycled catalyst.

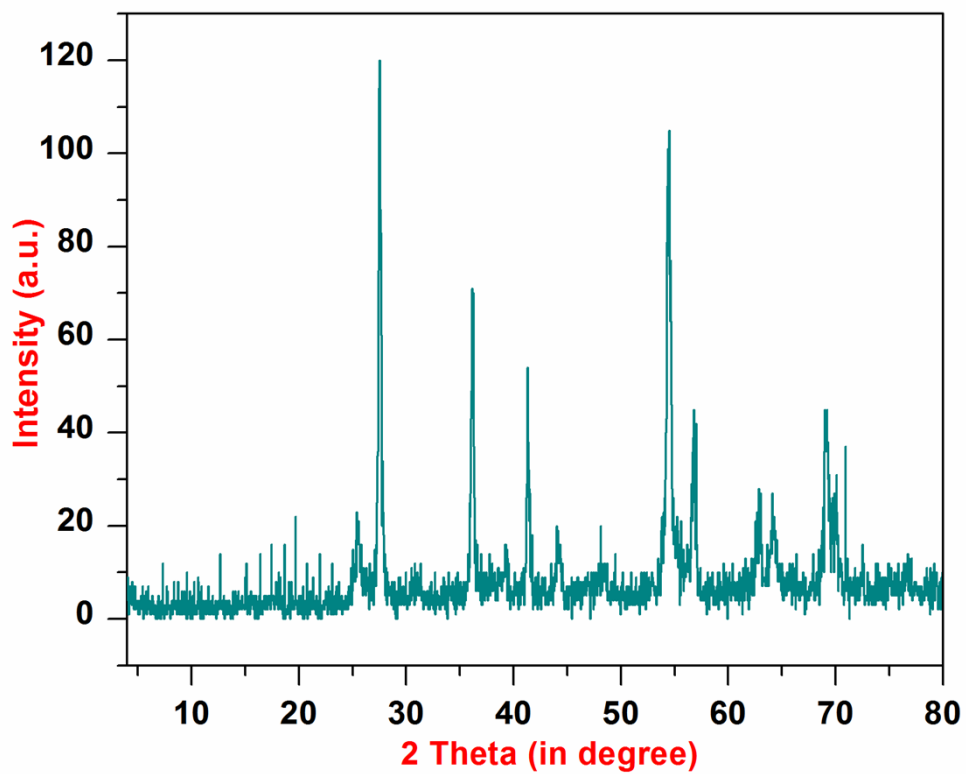

**Fig. S11** UV-Vis spectra of in situ Ru(bpy)<sub>3</sub>/TiO<sub>2</sub> catalyst after five recycling experiments

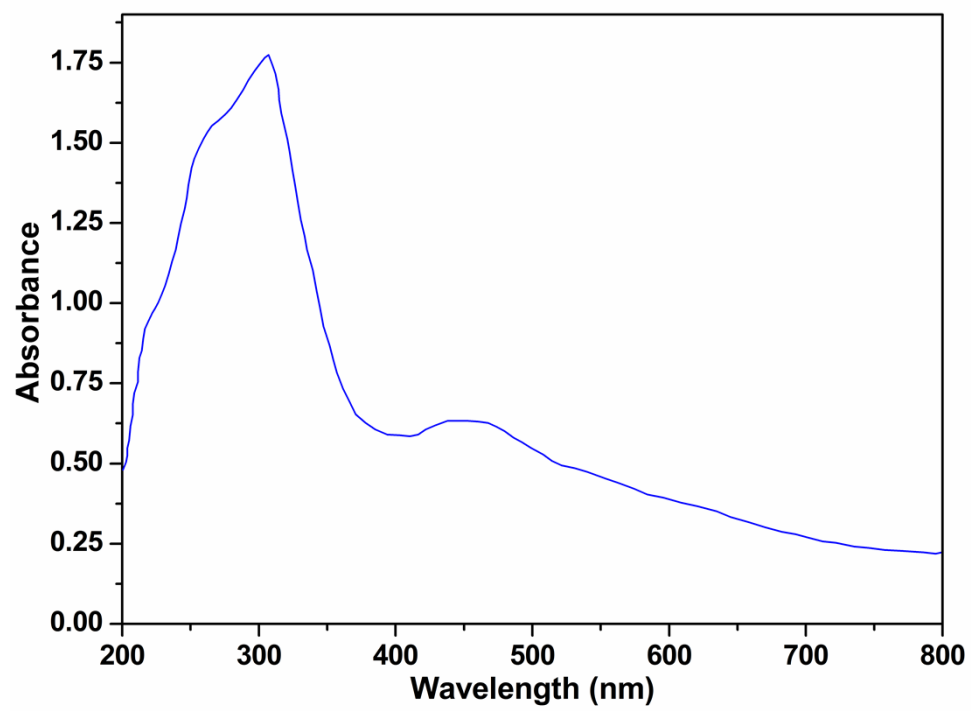

Fig. S12 Effect of ruthenium loading in hybrid  $\text{Ru}(\text{bpy})_3/\text{TiO}_2$  catalyst on the methanol yield.

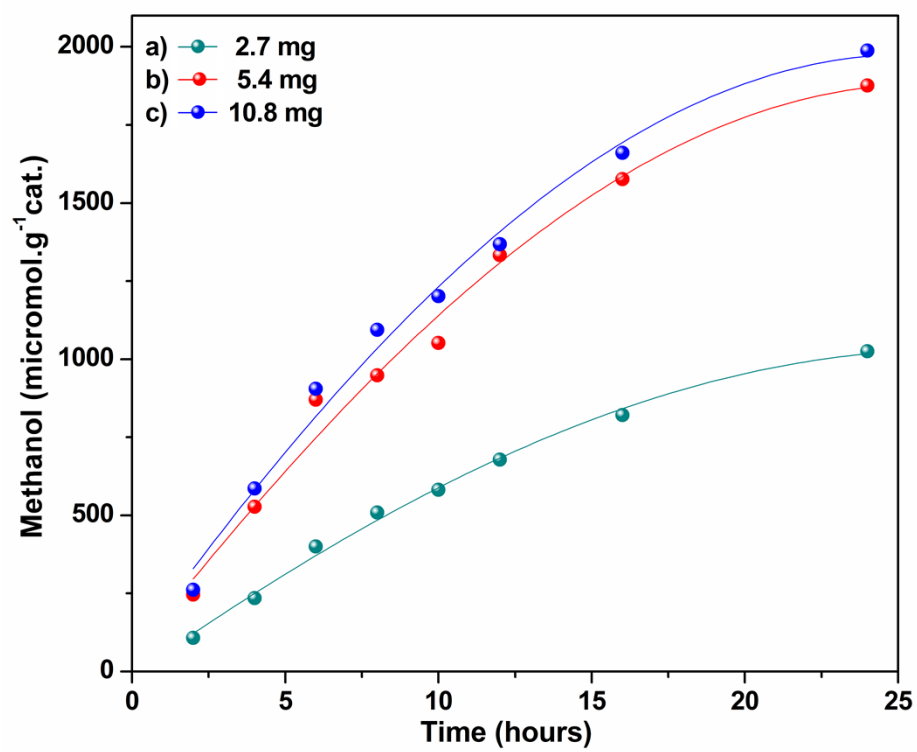

Supplement: c5nr03712c1.pdf [file c5nr03712c1.pdf]
